# Supplementary material for: Preclinical Evidence of STAT3 Inhibitor, Pacritinib, Overcomes Temozolomide Resistance via Down-Regulating miR-21-enriched Exosomes from M2 Glioblastoma-Associated Macrophages
Source: Preprints.org preprint supplement (doi:10.20944/preprints201905.0374.v1), 2019-05-31
Supplement: Supplementary file 1 [file supplementary]

## SUPPLEMENTARY INFORMATION

### **Preclinical evidence of STAT3 inhibitor, Pacritinib, overcomes temozolomide resistance via down-regulating miR-21-enriched exosomes from M2 glioblastoma-associated macrophages**

#### **Authors:**

Hao-Yu Chuang<sup>1,2,3</sup>, Yu-kai Su<sup>4,5,6,7</sup>, Heng-Wei Liu<sup>4,5,6,7</sup>, Chao-Hsuan Chen<sup>8,9,10,11</sup>, Shao-Chih Chiu<sup>8,9,10,11</sup>, Der-Yang Cho<sup>8,9,10,11</sup>, Shinn-Zong Lin<sup>12,13</sup>, Yueh-Sheng Chen<sup>14\*</sup>, Chien-Min Lin<sup>4,5,6,7\*</sup>

#### **Affiliation:**

1. Graduate Institute of Clinical Medical Science, China Medical University, Taichung, Taiwan
2. Department of Neurosurgery, An Nan Hospital, China Medical University, Tainan, Taiwan
3. Department of Neurosurgery, China Medical University Beigang Hospital, Yunlin, Taiwan
4. Graduate Institute of Clinical Medicine, College of Medicine, Taipei Medical University, Taipei City 11031, Taiwan
5. Department of Neurology, School of Medicine, College of Medicine, Taipei Medical University, Taipei City 11031, Taiwan
6. Division of Neurosurgery, Department of Surgery, Taipei Medical University-Shuang Ho Hospital, New Taipei City 23561, Taiwan
7. Taipei Neuroscience Institute, Taipei Medical University, Taipei 11031, Taiwan
8. Center for Cell Therapy, China Medical University Hospital, Taichung, Taiwan
9. Drug Development Center, China Medical University, Taichung, Taiwan
10. Graduate Institute of Biomedical Sciences, China Medical University, Taichung, Taiwan
11. Department of Neurosurgery, China Medical University Hospital, Taichung, Taiwan
12. Bioinnovation Center, Buddhist Tzu Chi Medical Foundation, Hualien, Taiwan
13. Department of Neurosurgery, Tzu Chi University, Hualien Tzu Chi Hospital, Buddhist Tzu Chi Medical Foundation, Hualien, Taiwan

14. Department of Biomedical Imaging and Radiological Science, China Medical University, Taichung, Taiwan

**\*Corresponding authors:**

Yueh-Sheng Chen, PhD.: Department of Biomedical Imaging and Radiological Science, China Medical University, Taichung, Taiwan; Tel.: +886-2-2490088 ext. 8881; Fax: 886-2-2248-0900; E-mail: [yuehsc@mail.cmu.edu.tw](mailto:yuehsc@mail.cmu.edu.tw)

Chien-Min Lin, MD., PhD, Department of Neurosurgery, Taipei Medical University - Shuang Ho Hospital, New Taipei City 23561, Taiwan, Tel: +886-2-2490088 ext. 8885; Fax: +886-2-2248-0900; E-mail addresses: [m513092004@tmu.edu.tw](mailto:m513092004@tmu.edu.tw)

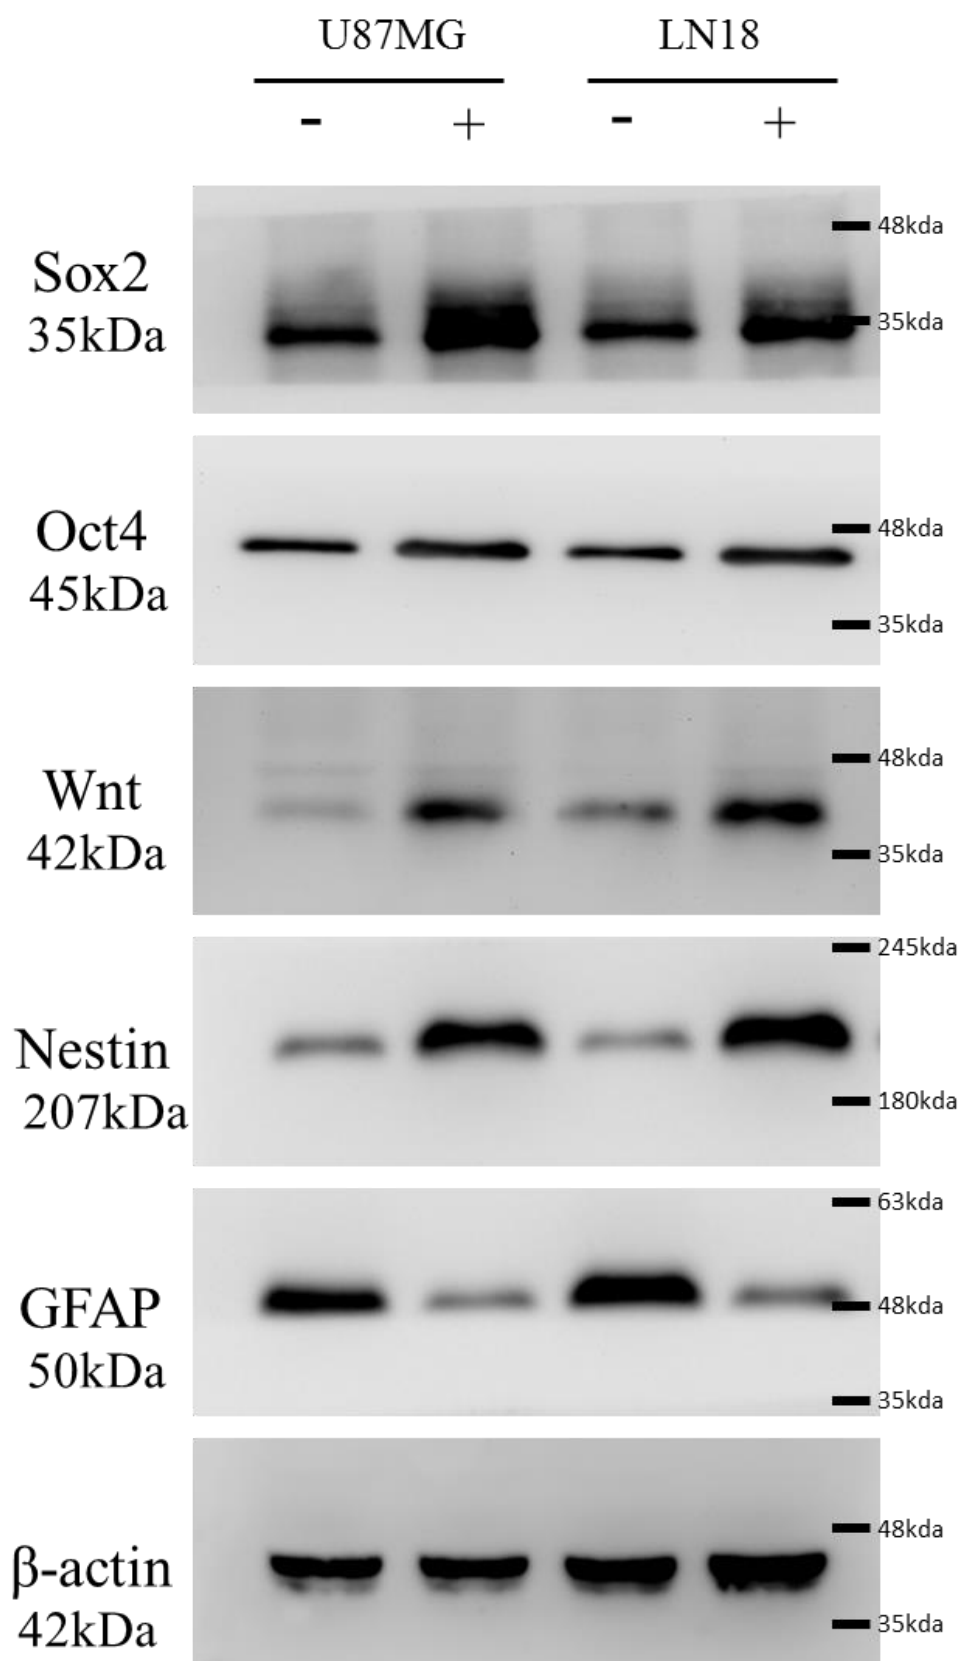

**Supplementary Figure S1.** Full-size blots of Figure 1D

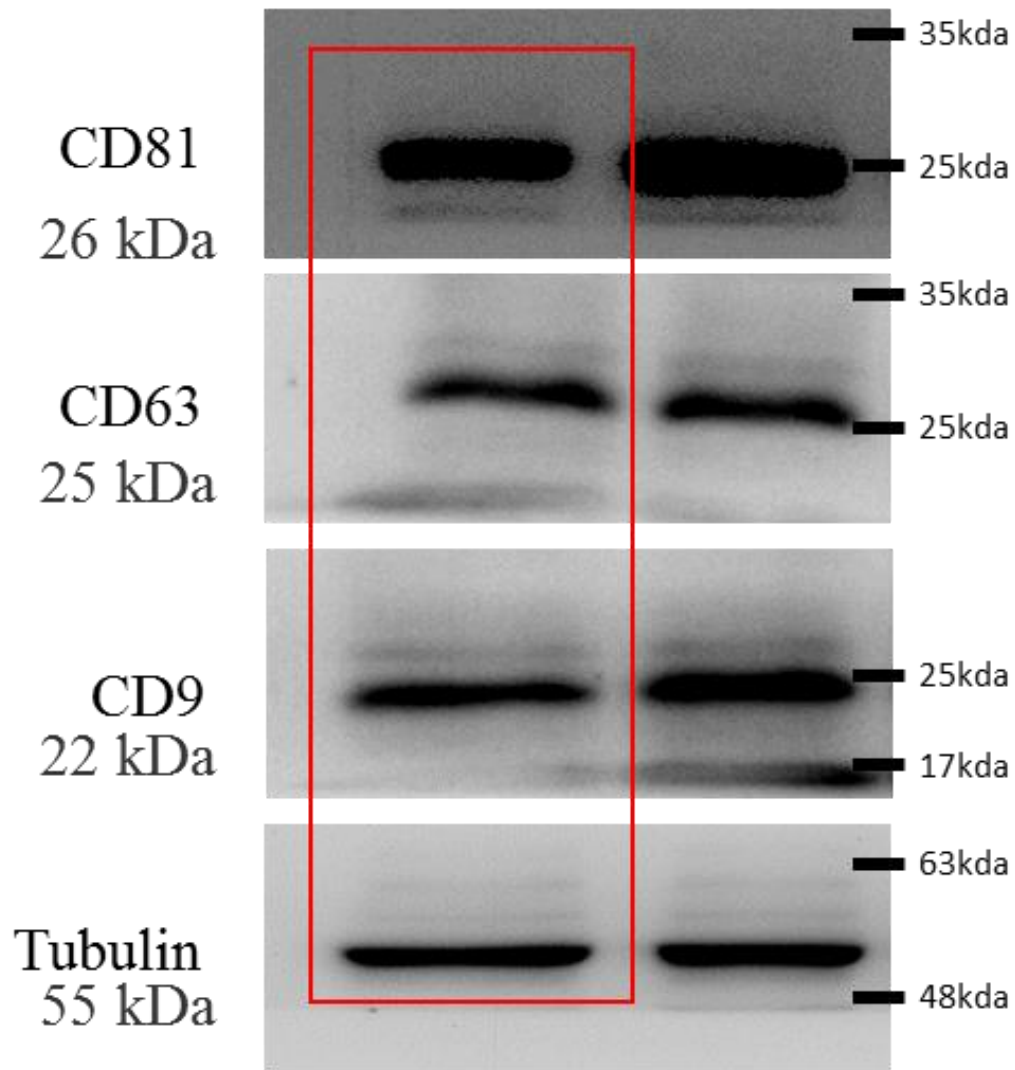

**Supplementary Figure S2.** Full-size blots of Figure 2A

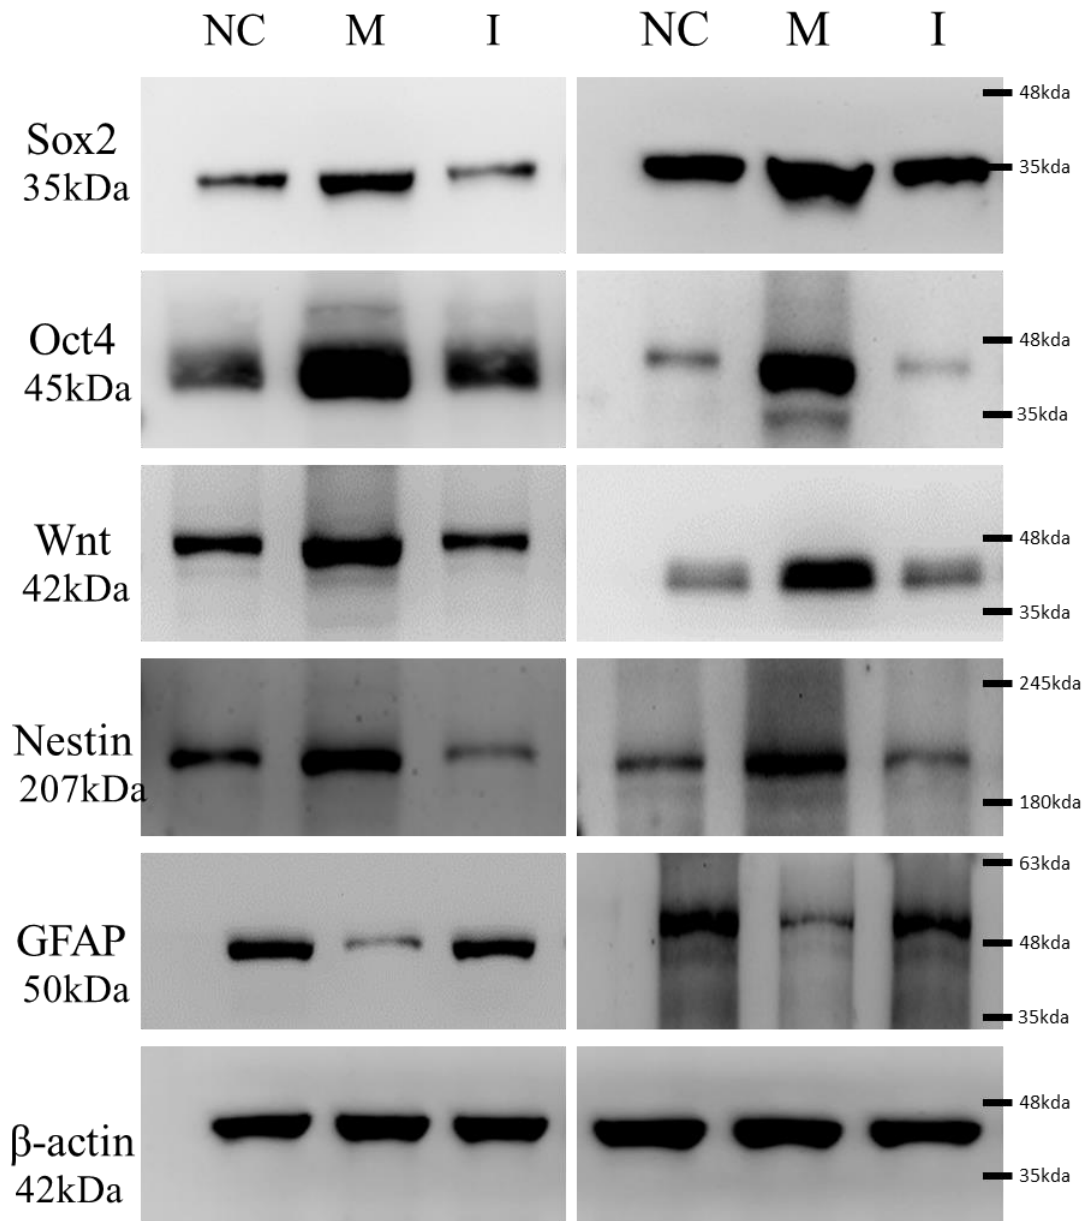

**Supplementary Figure S3.** Full-size blots of Figure 3C

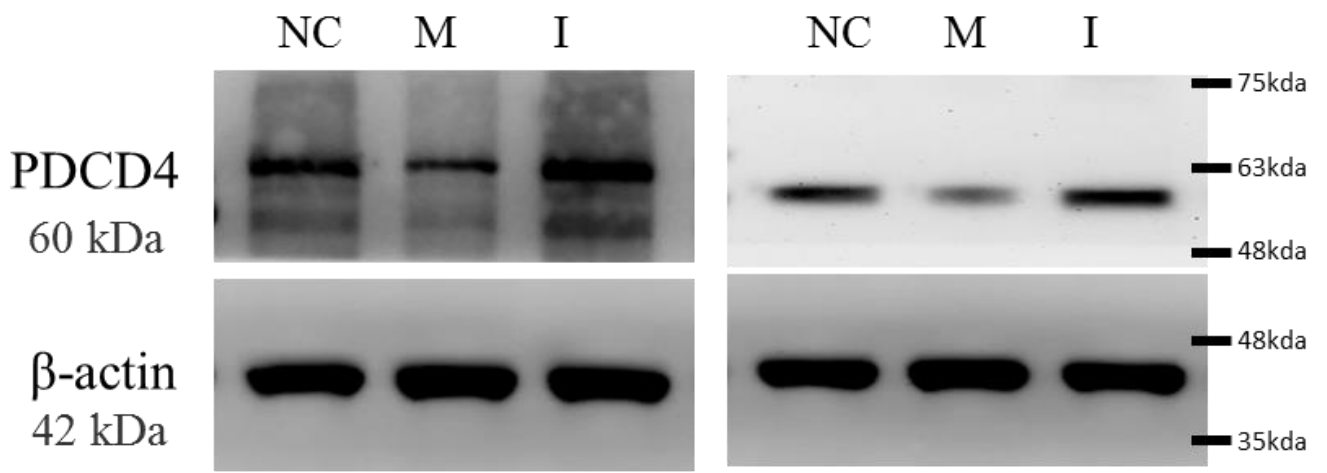

**Supplementary Figure S4.** Full-size blots of Figure 4C

**Supplementary Table S1.** Primer sequences used in this study

| Gene          | Forward sequence        | Reverse sequence         |
|---------------|-------------------------|--------------------------|
| Sox2          | GCCGAGTGGAAACTTTTGTCG   | GGCAGCGTGTACTTATCCTTCT   |
| STAT3         | CAGCAGCTTGACACACGGTA    | AAACACCAAAGTGGCATGTGA    |
| IL-6          | ACTCACCTCTTCAGAACGAATTG | CCATCTTTGGAAGGTTTCAGGTTG |
| GAPDH         | GAGTCAACGGATTTGTCGT     | GACAAGCTTCCCGTTCTCAG     |
| Nestin        | CTGCTACCCTTGAGACACCTG   | GGGCTCTGATCTCTGCATCTAC   |
| PDCD4         | GGGAGTGACGCCCTTAGAAG    | ACCTTTCTTTGGTAGTCCCCTT   |
| CD206         | TCCGGGTGCTGTTCTCCTA     | CCAGTCTGTTTTTGGATGGCACT  |
| TNF- $\alpha$ | GAGGCCAAGCCCTGGTATG     | CGGGCCGATTGATCTCAGC      |

**Supplementary Table S2.** Western blot antibodies sheet

---

| No. | Target         | Dilution |            | Source        |
|-----|----------------|----------|------------|---------------|
| 1   | Sox2           | 1:1000   | ab137385   | Abcam         |
| 2   | Oct4           | 1:1000   | ab18976    | Abcam         |
| 3   | Wnt            | 1:1000   | ab228526   | Abcam         |
| 4   | Nestin         | 1:1000   | ab105389   | Abcam         |
| 5   | GFAP           | 1:1000   | ab33922    | Abcam         |
| 6   | CD81           | 1:500    | 10630D     | Thermo        |
| 7   | CD63           | 1:500    | 10628D     | Thermo        |
| 8   | CD9            | 1:500    | AHS0902    | Thermo        |
| 9   | PDCD4          | 1:1000   | #9535      | cellsignaling |
| 10  | Tubulin        | 1:10000  | 11224-1-AP | PROTEINTECH   |
| 11  | $\beta$ -actin | 1:10000  | 66009-1-Ig | PROTEINTECH   |

---
